# Supplementary material for: Clinical outcomes of immune checkpoint inhibitor therapy for advanced lung adenosquamous carcinoma
Source: PubMed Central journal article supplement — J Thorac Dis. 2023 Jan 9;15(2):260–9. doi: 10.21037/jtd-22-1011 (PMC9992578; doi:10.21037/jtd-22-1011), 2023-01-09
Supplement: jtd-15-02-260-dss.pdf [file jtd-15-02-260-dss.pdf]

## Data Sharing Statement

|                     |                                                                                                                                                    |                                                                                                                        |
|---------------------|----------------------------------------------------------------------------------------------------------------------------------------------------|------------------------------------------------------------------------------------------------------------------------|
| <b>Article Info</b> | https://dx.doi.org/10.21037/jtd-22-1011                                                                                                            |                                                                                                                        |
| <b>Item</b>         | <b>Question</b>                                                                                                                                    | <b>Authors' Response<br/>(place "-" if not applicable)</b>                                                             |
| 1                   | Would you like to share data collected for your study to others?                                                                                   | Yes                                                                                                                    |
| 2                   | If not, would you like to share the reason for your decision?                                                                                      | -                                                                                                                      |
| 3                   | What data in particular will be shared?                                                                                                            | The survival data in particular will be shared.                                                                        |
| 4                   | Any other documents will be share? Such as study protocol, statistical analysis plan, informed consent form, clinical study report, analytic code. | Statistical analysis plan will also be shared if requested.                                                            |
| 5                   | When will data availability begin?                                                                                                                 | From the publication date.                                                                                             |
| 6                   | When will data availability end?                                                                                                                   | Two years within the publication date, since the technique or survival date may be updated over time.                  |
| 7                   | To whom will you share the data?                                                                                                                   | Medical oncologists and pulmonary physicians who are interested in this study.                                         |
| 8                   | For what type of analysis or purpose?                                                                                                              | For analysis to evaluate the efficacy of immune checkpoint inhibitors (ICIs) in lung adenosquamous carcinoma patients. |
| 9                   | How or where can the data/documents be obtained?                                                                                                   | Emails could be sent to the address below to obtain the shared data:<br>songzb@zjcc.org.cn.                            |
| 10                  | Any other restrictions?                                                                                                                            | We may balance the potential benefits and risks for each request and then provide the data that could be shared.       |
