# Supplementary material for: Clinical outcomes of immune checkpoint inhibitor therapy for advanced lung adenosquamous carcinoma
Source: PubMed Central journal article supplement — J Thorac Dis. 2023 Jan 9;15(2):260–9. doi: 10.21037/jtd-22-1011 (PMC9992578; doi:10.21037/jtd-22-1011), 2023-01-09
Supplement: jtd-15-02-260-supplementary.pdf [file jtd-15-02-260-supplementary.pdf]

**Table S1** Baseline characteristics of patients with lung adenosquamous carcinoma received ICI monotherapy and combination ICI therapy

| Characteristics          | Patients, n (%) | Monotherapy, n (%) | Combination treatment, n (%) | P value |
|--------------------------|-----------------|--------------------|------------------------------|---------|
| ECOG PS                  |                 |                    |                              |         |
| 0-1                      | 31 (81.6)       | 8 (88.9)           | 23 (79.3)                    | 1.000   |
| 2                        | 7 (18.4)        | 1 (11.1)           | 6 (20.7)                     |         |
| TNM staging              |                 |                    |                              |         |
| III                      | 9 (23.7)        | 2 (22.2)           | 7 (24.1)                     | 1.000   |
| IV                       | 29 (76.3)       | 7 (77.8)           | 22 (75.9)                    |         |
| Liver metastasis         |                 |                    |                              |         |
| Yes                      | 4 (10.5)        | 0 (0)              | 4 (13.8)                     | 0.554   |
| No                       | 34 (89.5)       | 9 (100.0)          | 25 (96.2)                    |         |
| Brain metastasis         |                 |                    |                              |         |
| Yes                      | 7 (18.4)        | 1 (11.1)           | 6 (20.7)                     | 1.000   |
| No                       | 31 (81.6)       | 8 (88.9)           | 23 (79.3)                    |         |
| Bone metastasis          |                 |                    |                              |         |
| Yes                      | 14 (36.8)       | 4 (44.4)           | 10 (34.5)                    | 0.699   |
| No                       | 24 (63.2)       | 5 (55.6)           | 19 (65.5)                    |         |
| PD -L1 status            |                 |                    |                              |         |
| Positive                 | 11 (28.9)       | 3 (33.3)           | 8 (27.6)                     | 1.000   |
| Negative                 | 6 (15.8)        | 1 (11.1)           | 5 (17.2)                     |         |
| Unknown                  | 21 (55.3)       | 5 (55.6)           | 16 (55.2)                    |         |
| PD-1 inhibitors          |                 |                    |                              |         |
| Sintilimab               | 13 (34.2)       | 1 (11.1)           | 12 (41.4)                    | 0.283   |
| Tislelizumab             | 5 (13.2)        | 1 (11.1)           | 4 (13.8)                     |         |
| Pembrolizumab            | 6 (15.8)        | 1 (11.1)           | 5 (17.2)                     |         |
| Nivolumab                | 4 (10.5)        | 2 (22.2)           | 2 (6.9)                      |         |
| Other PD-1 inhibitors    | 10 (26.3)       | 4 (44.4)           | 6 (20.7)                     |         |
|                          |                 |                    |                              |         |
| Line of ICI treatment    |                 |                    |                              |         |
| First line               | 17 (44.7)       | 2 (22.2)           | 15 (51.7)                    | 0.148   |
| Second or more line      | 21 (55.3)       | 7 (77.8)           | 21 (72.4)                    |         |
| ICI combination drugs    |                 |                    |                              |         |
| Taxane plus platinum     | 12 (41.4)       | 0 (0.0)            | 12 (41.4)                    | < 0.001 |
| Pemetrexed plus platinum | 6 (20.7)        | 0 (0.0)            | 6 (20.7)                     |         |
| Pemetrexed               | 5 (17.2)        | 0 (0.0)            | 5 (17.2)                     |         |
| Taxane                   | 3 (10.3)        | 0 (0.0)            | 3 (10.3)                     |         |
| Taxane plus bevacizumab  | 3 (10.3)        | 0 (0.0)            | 3 (10.3)                     |         |
|                          |                 |                    |                              |         |

ECOG PS, Eastern Cooperative Oncology Group Performance status; ICI, immune checkpoint inhibitor; PD-L1, programmed death-ligand 1.
